# Supplementary material for: Phylogenetic and AlphaFold predicted structure analyses provide insights for A1 aspartic protease family classification in Arabidopsis
Source: PubMed Central journal article supplement (PMC9937552; doi:10.3389/fpls.2023.1072168), 2023-02-03
Supplement: DataSheet_1.pdf [file DataSheet_1.pdf]

g1yaa.Mb2: TVASDGT... (Genomic coordinates and sequence alignment)
g1yaa.Mb2: 120
g1yaa.Mb2: 121
g1yaa.Mb2: 122
g1yaa.Mb2: 123
... (Sequence alignment continues with various coordinates and identifiers)
M914380: TACGG... (Genomic coordinates and sequence alignment)
M914380: 114
M914380: 115
M914380: 116
M914380: 117
... (Sequence alignment continues with various coordinates and identifiers)
M914400: TTTAG... (Genomic coordinates and sequence alignment)
M914400: 122
M914400: 123
M914400: 124
M914400: 125
... (Sequence alignment continues with various coordinates and identifiers)
M914430: ATGTT... (Genomic coordinates and sequence alignment)
M914430: 126
M914430: 127
M914430: 128
M914430: 129
... (Sequence alignment continues with various coordinates and identifiers)

Multiple lines of text, likely a list of identifiers and associated data, possibly representing a sequence or a set of coordinates. The text is dense and appears to be a list of items, possibly related to a biological or chemical study. The text is mostly black with some blue highlights.
